# Supplementary material for: Fundamentals and application potential of the synergy effect between ZnO and Mo/SiO2 for propene production in the metathesis of ethylene and trans-2-butene
Source: Royal Society of Chemistry journal article supplement (doi:10.1039/d2cy00895e), 2022-01-01
Supplement: d2cy00895e1.pdf [file d2cy00895e1.pdf]

## Electronic Supplementary Information

### **Fundamentals and application potential of synergy effect between ZnO and Mo/SiO<sub>2</sub> for propene production in the metathesis of ethylene and trans-2 butene**

Qiyang Zhang, Tatiana Otroshchenko\*, Evgenii V. Kondratenko\*

*Leibniz-Institut für Katalyse e.V. an der Universität Rostock, Albert-Einstein-Str. 29a, D-18059 Rostock, Germany*

\*To whom correspondence should be addressed.

E-mail: [tatiana.otroshchenko@catalysis.de](mailto:tatiana.otroshchenko@catalysis.de) (TO), [Evgenii.kondratenko@catalysis.de](mailto:Evgenii.kondratenko@catalysis.de) (EVK)

## Tables

**Table S1** The surface area and the average size of crystallites of different ZnO.

| Sample | Surface area / $\text{m}^2 \cdot \text{g}^{-1}$ | Crystallite size / nm |
|--------|-------------------------------------------------|-----------------------|
| a-ZnO  | 4                                               | 69.3                  |
| b-ZnO  | 35                                              | 10.3                  |
| c-ZnO  | 7                                               | 58.0                  |

**Table S2** Apparent activation energies of propene formation in the metathesis of ethylene with 2-butene determined in the temperature range from 100 to 200°C.

| Sample              | $E_a$ , kJ/mol |
|---------------------|----------------|
| Mo/SiO <sub>2</sub> | 15.5           |
| a-ZnO_dual-bed      | 94.3           |
| a-ZnO-1             | 92.9           |
| a-ZnO-5             | 105.8          |
| a-ZnO-10            | 100.1          |
| a-ZnO-20            | 99.9           |
| a-ZnO-50            | 104.0          |
| a-ZnO-100           | 88.1           |

## Figures

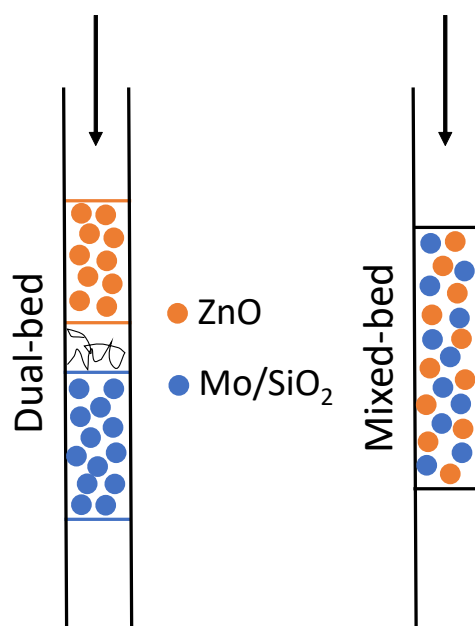

**Figure S1** A schematic representation of reactor configurations with different integration manners for ZnO and Mo/SiO<sub>2</sub>.

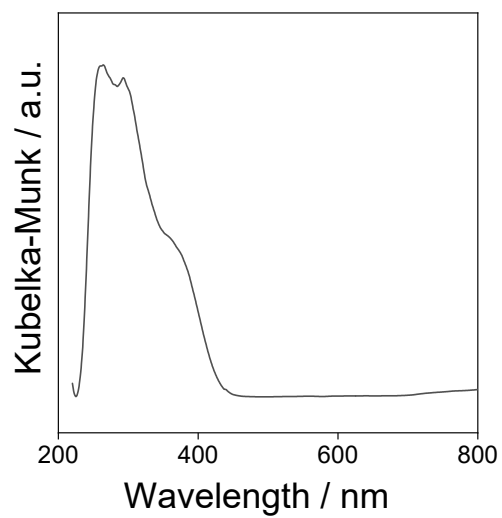

**Figure S2** The UV-vis spectrum of Mo/SiO<sub>2</sub> at room temperature after catalyst treatment in air at 500°C for 1 h.

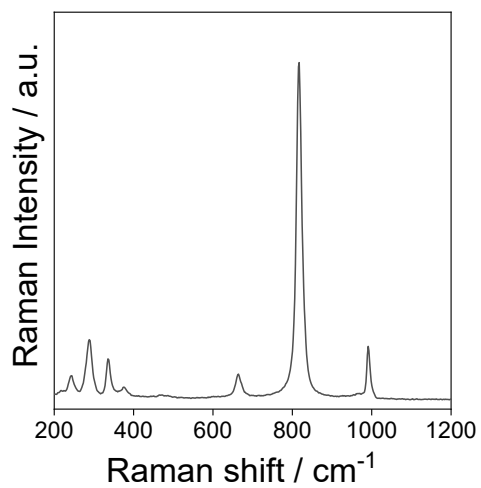

**Figure S3** The Raman spectrum of Mo/SiO<sub>2</sub> at room temperature after catalyst treatment in air at 500°C for 1 h.

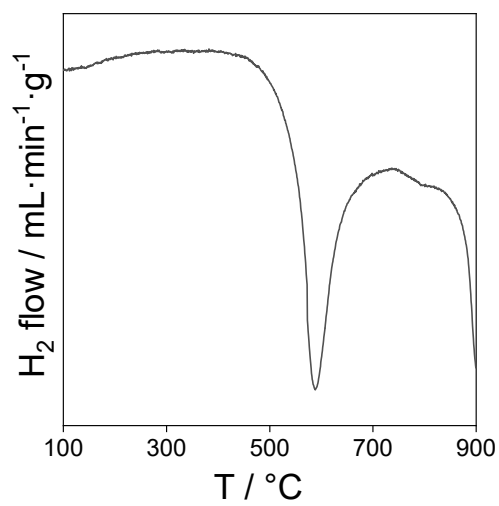

**Figure S4** The profile of outlet H<sub>2</sub> flow in temperature-programmed reduction of Mo/SiO<sub>2</sub> with 5vol% H<sub>2</sub> in Ar.

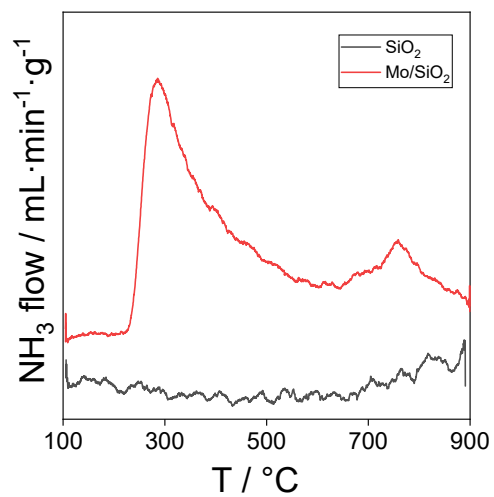

**Figure S5** The profile of outlet NH<sub>3</sub> flow in temperature-programmed desorption of NH<sub>3</sub> from Mo/SiO<sub>2</sub> or bare SiO<sub>2</sub>.



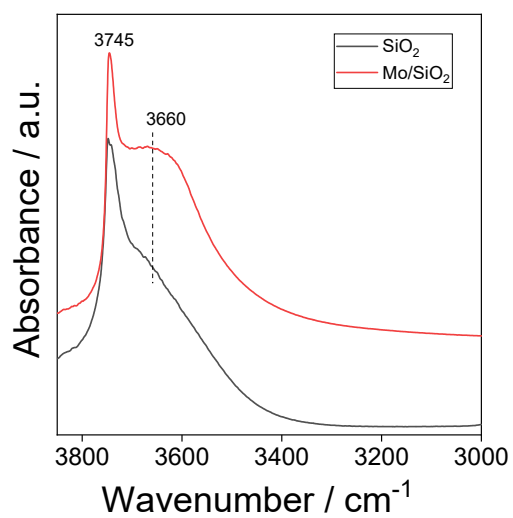

**Figure S6** *In situ* DRIFT spectra of Mo/SiO<sub>2</sub> and bare SiO<sub>2</sub>. The spectra were recorded at 150°C after treatment of the samples in air at 450 °C for 1h.

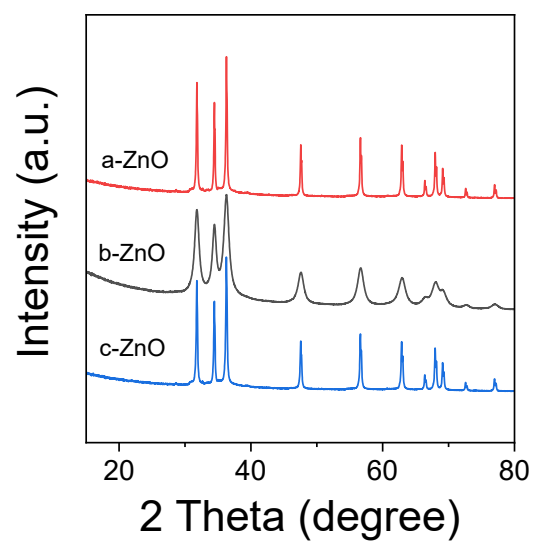

**Figure S7** XRD patterns of a-ZnO, b-ZnO and c-ZnO.

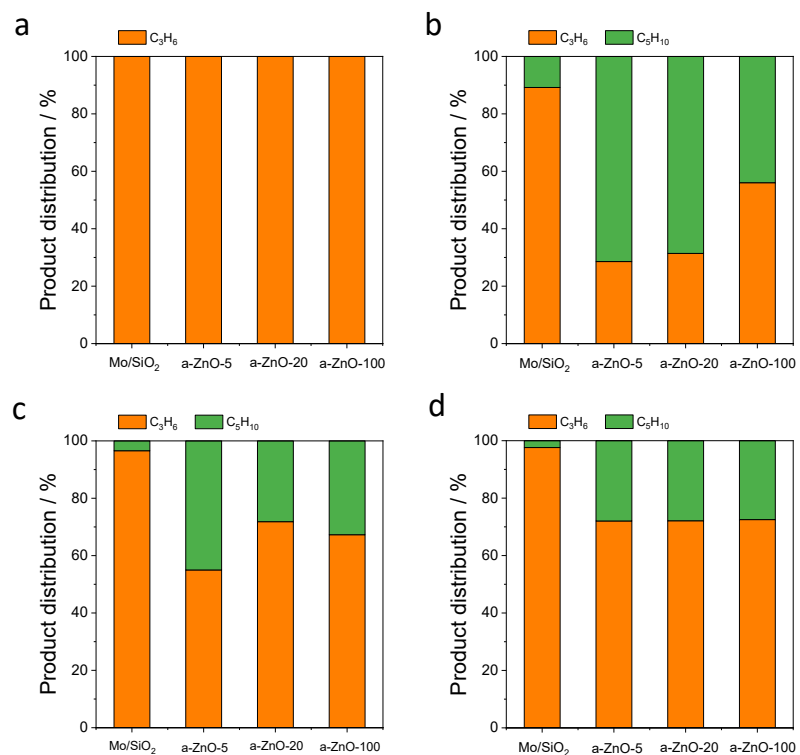

**Figure S8** The effect of the presence of a-ZnO and the weight ratio of a-ZnO to Mo/SiO<sub>2</sub> on product distribution at (a) 50°C, (b) 100°C, (c) 150°C and (d) 200°C.

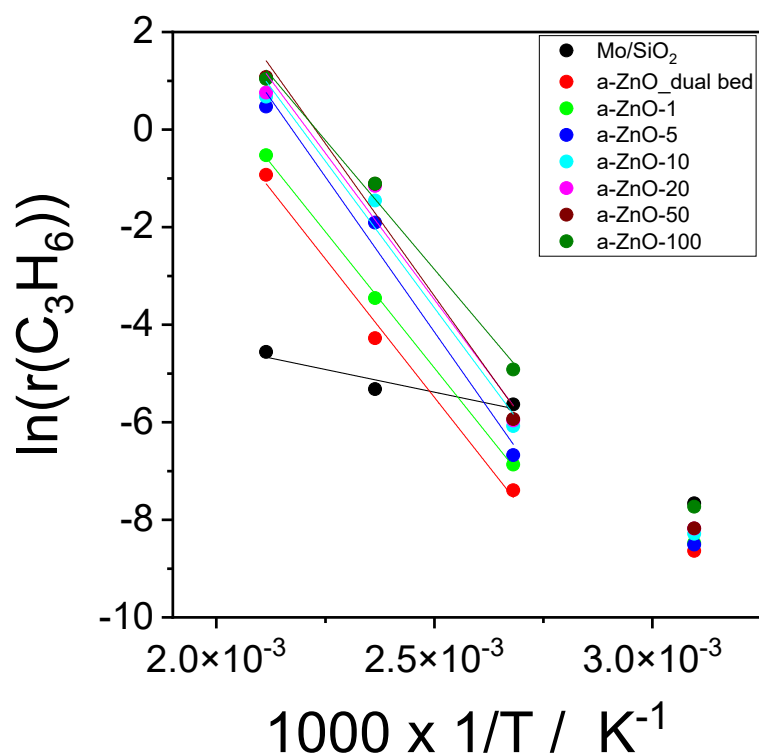

**Figure S9** Arrhenius plots of the rate of propene formation in the metathesis of ethylene with 2-butene over Mo/SiO<sub>2</sub> and different Mo/SiO<sub>2</sub>-ZnO combinations. Reaction conditions: T=50 – 200° C, feed composition: C<sub>2</sub>H<sub>4</sub>/trans-2-C<sub>4</sub>H<sub>8</sub>/N<sub>2</sub>=5/5/1. The activation energy was calculated for the temperature range between 100 and 200°C.

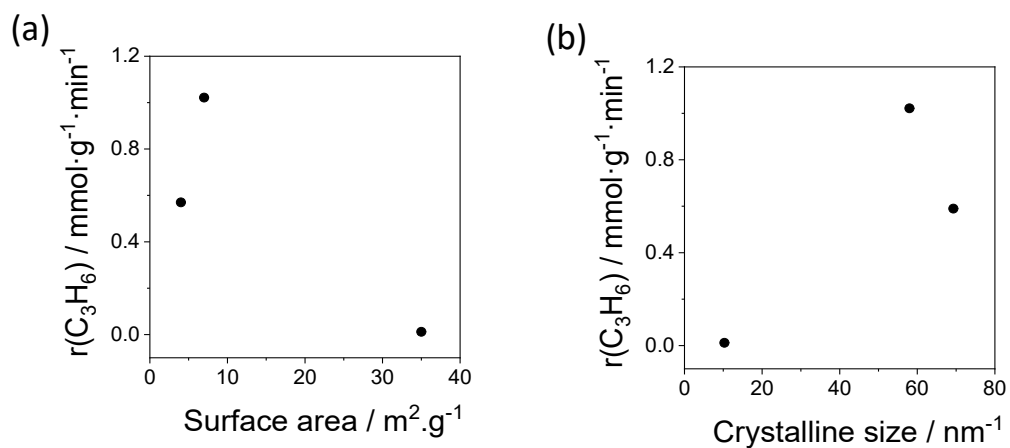

**Figure S10** The dependences of the rate of propene formation over physically mixed Mo/SiO<sub>2</sub> and ZnO (the weight ratio of ZnO to Mo/SiO<sub>2</sub> of 1:1) at 200°C on (a) the specific surface area of ZnO and (b) the size of crystallites of ZnO.

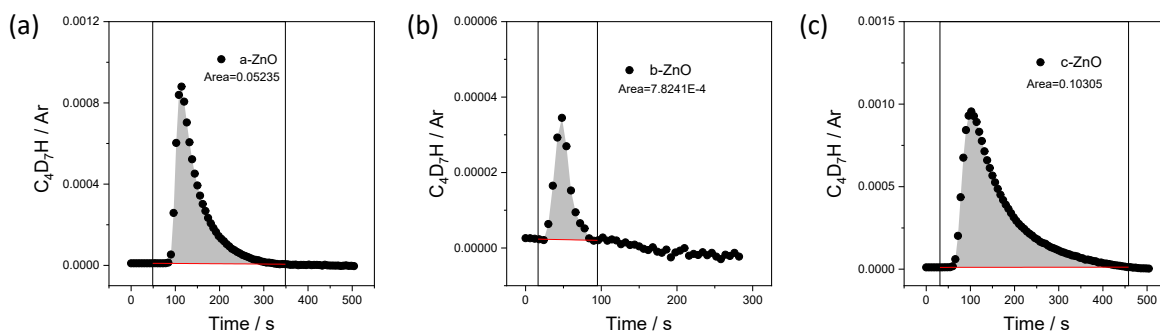

**Figure S11** MS signal of  $C_4D_7H$  ( $m/z=63$ ) collected during the H-D experiments with different ZnO samples using  $C_4H_8$ - and 2- $C_4D_8$ -containing feeds.
